# Supplementary material for: Single-nucleus RNA-seq of differentiating human myoblasts reveals the extent of fate heterogeneity
Source: PubMed Central journal article supplement — Nucleic Acids Res. 2016 Aug 26;44(21):e158. doi: 10.1093/nar/gkw739 (PMC5137429; doi:10.1093/nar/gkw739), 2016-08-26
Supplement: supp_gkw739_nar-00586-met-k-2016-File007.pdf [file supp_gkw739_nar-00586-met-k-2016-File007.pdf]

**Fig S1**

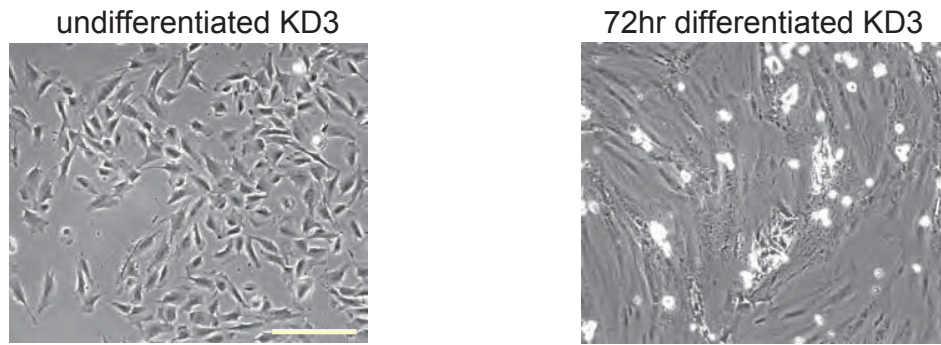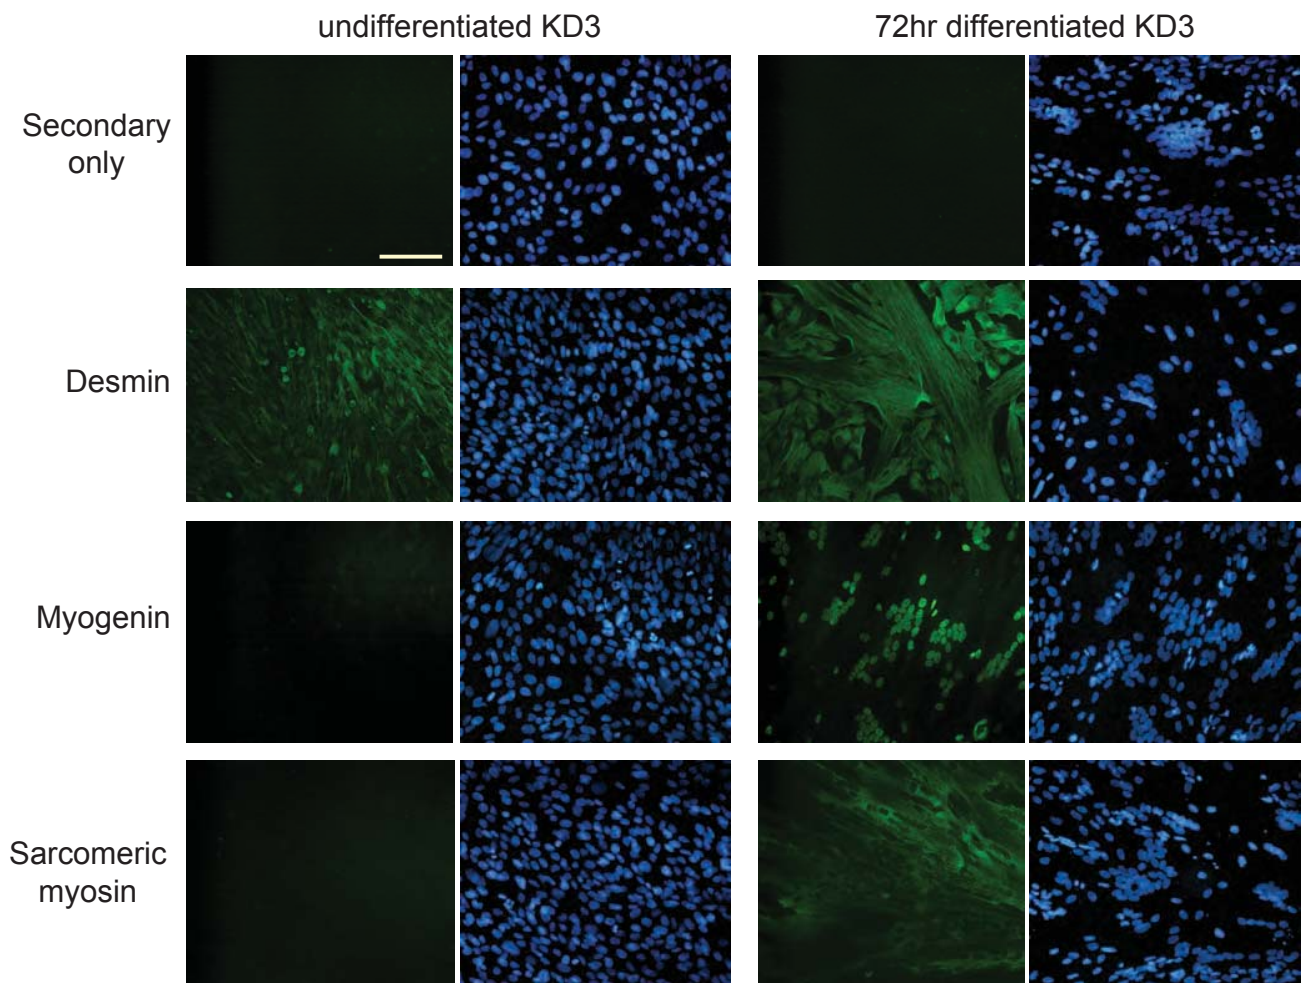

Scale bar is 100 $\mu$ m.

**FigS2**

**A**

undifferentiated KD3 myoblasts

72hr differentiated KD3

multinucleated myotube

MNCs between myotubes

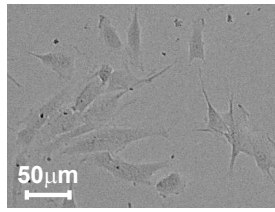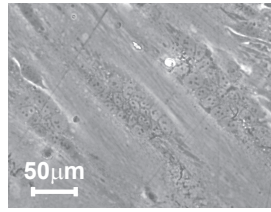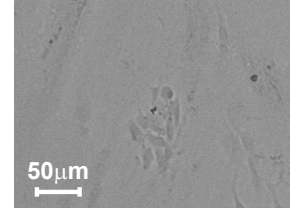

cell separation

detach cells with Trypsin/EDTA

trypsin/EDTA to remove MNCs

trypsin/EDTA to lift MNCs

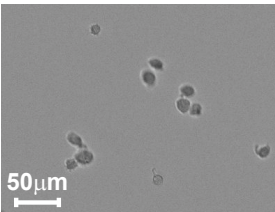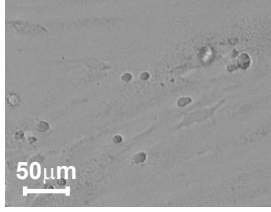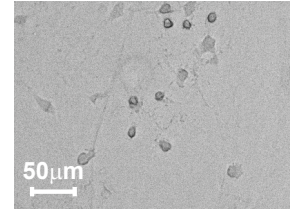

after removing MNCs, collect myotubes with cell scraper

spin down supernatant with MNCs

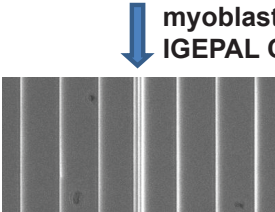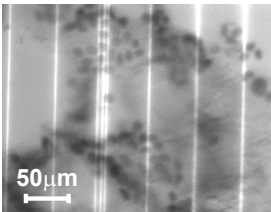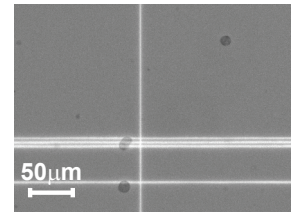

cell lysis and nucleus isolation

myoblast lysis by IGEPAL CA-630

myotube lysis by IGEPAL CA-630

MNC lysis by IGEPAL CA-630

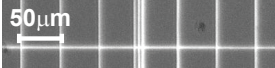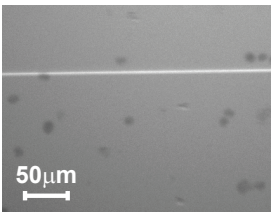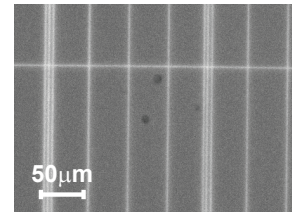

single nucleus captured on small size Fluidigm chip

single nucleus captured on small size Fluidigm chip

single nucleus captured on small size Fluidigm chip

**B**

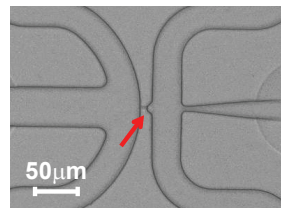

**Fig S3**

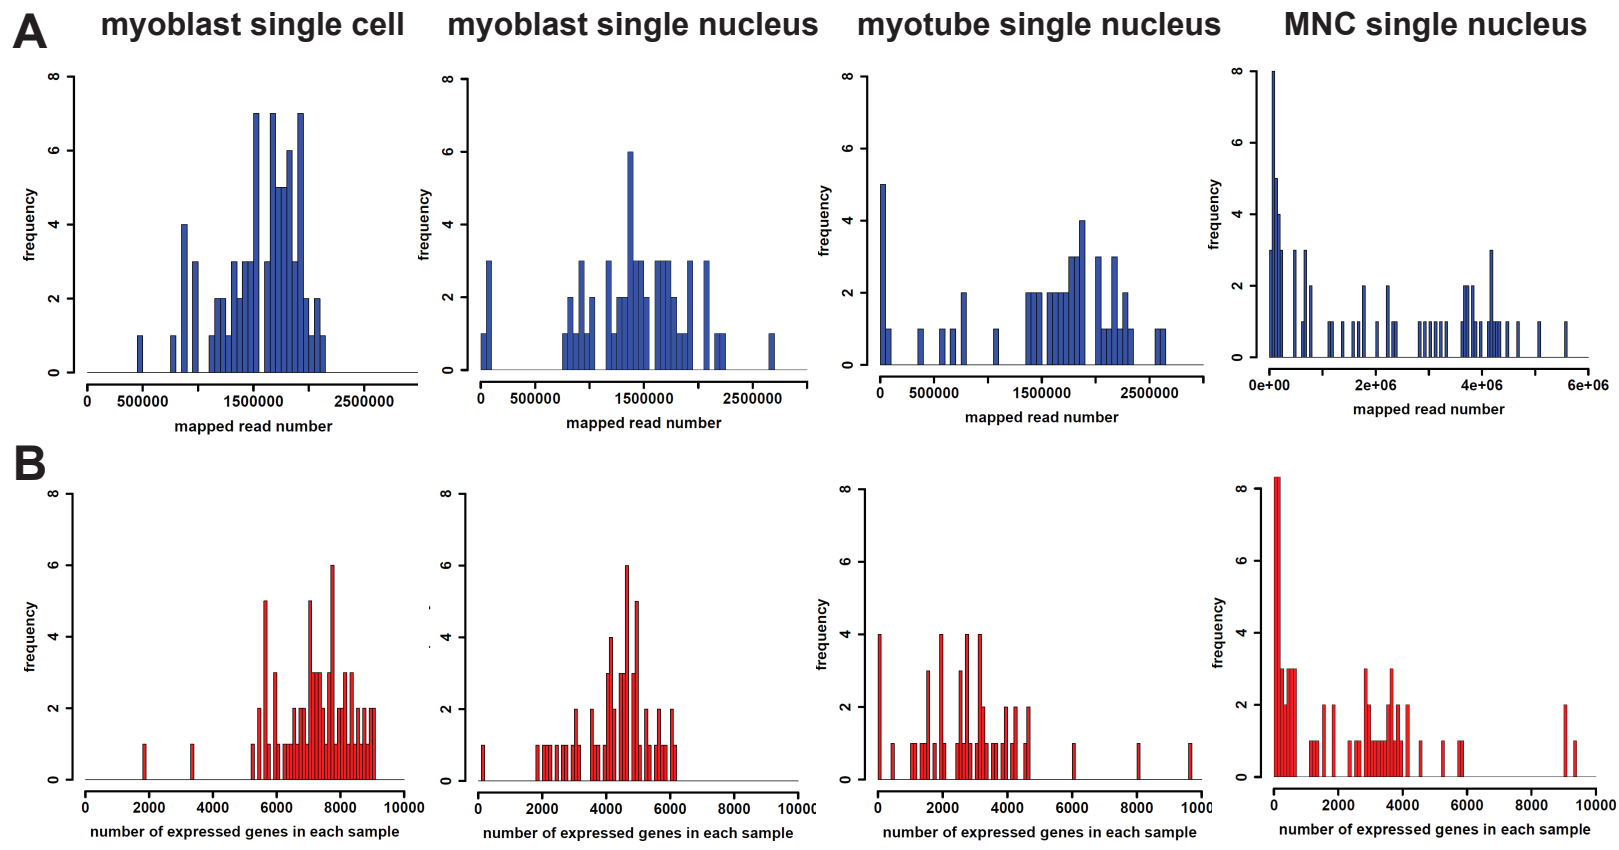

**Fig S4**

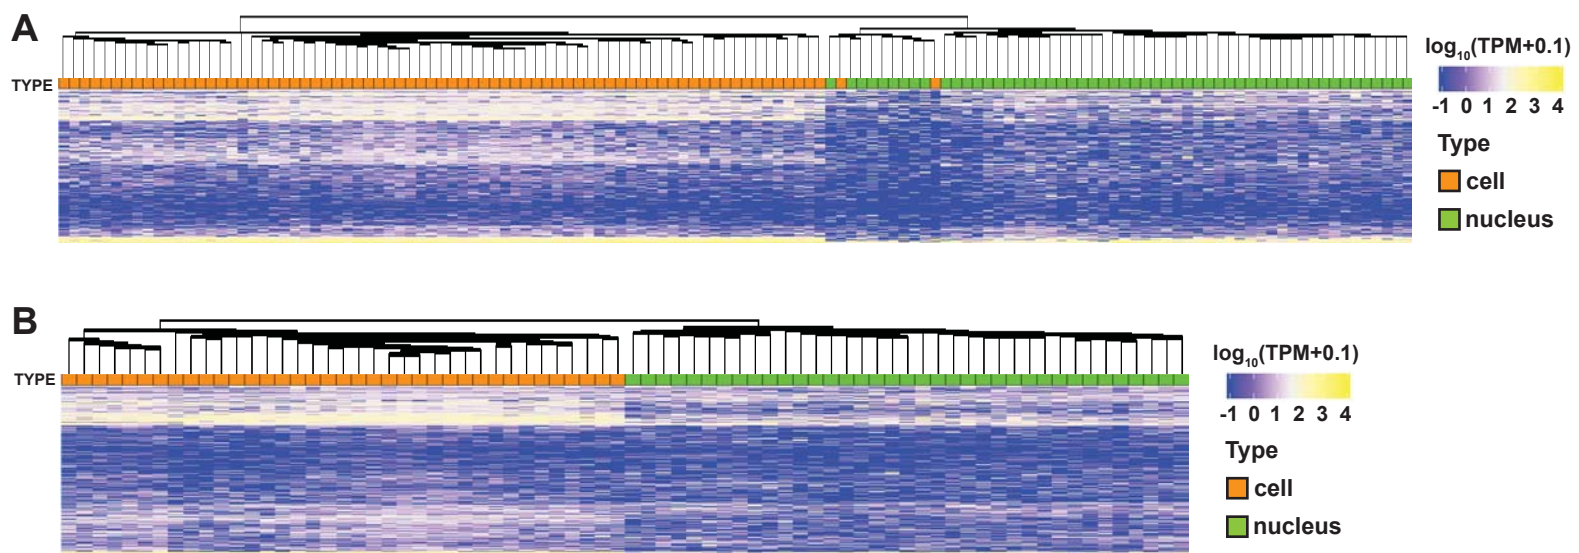

**Fig S5****A**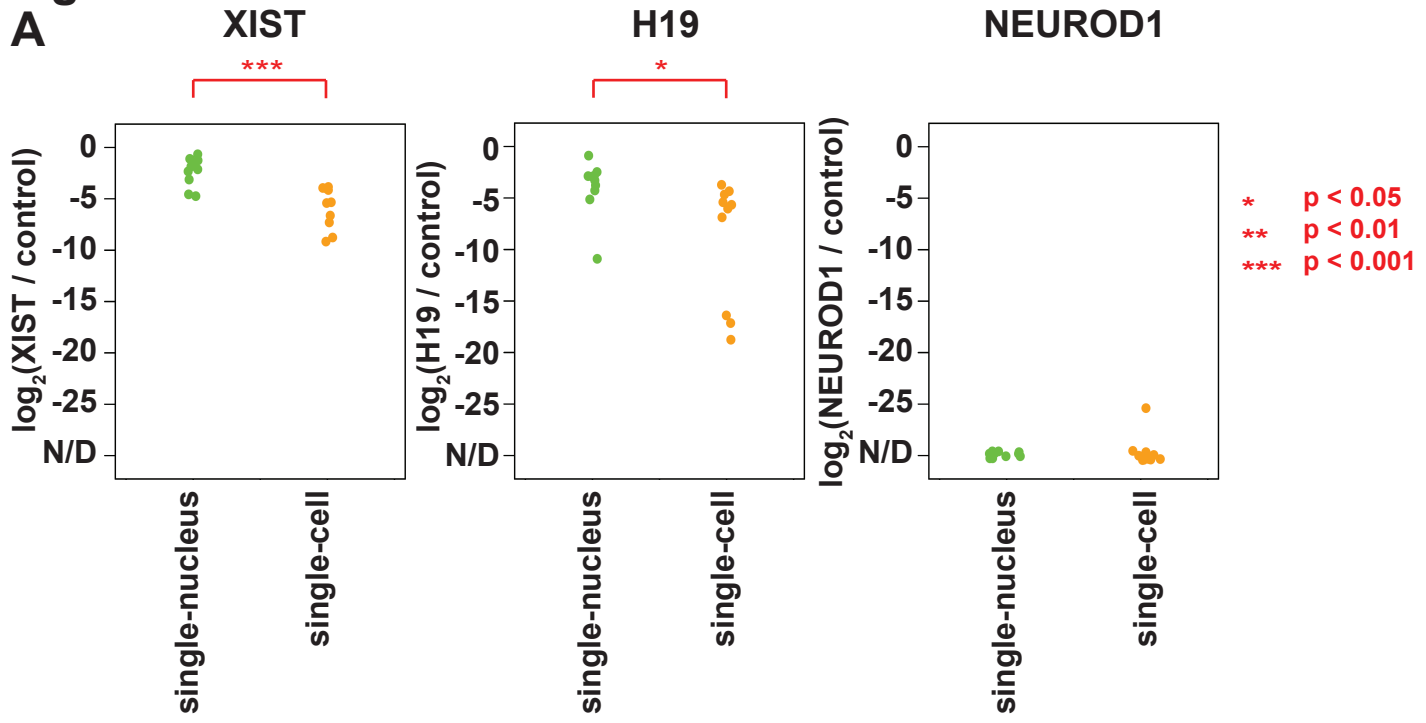**B**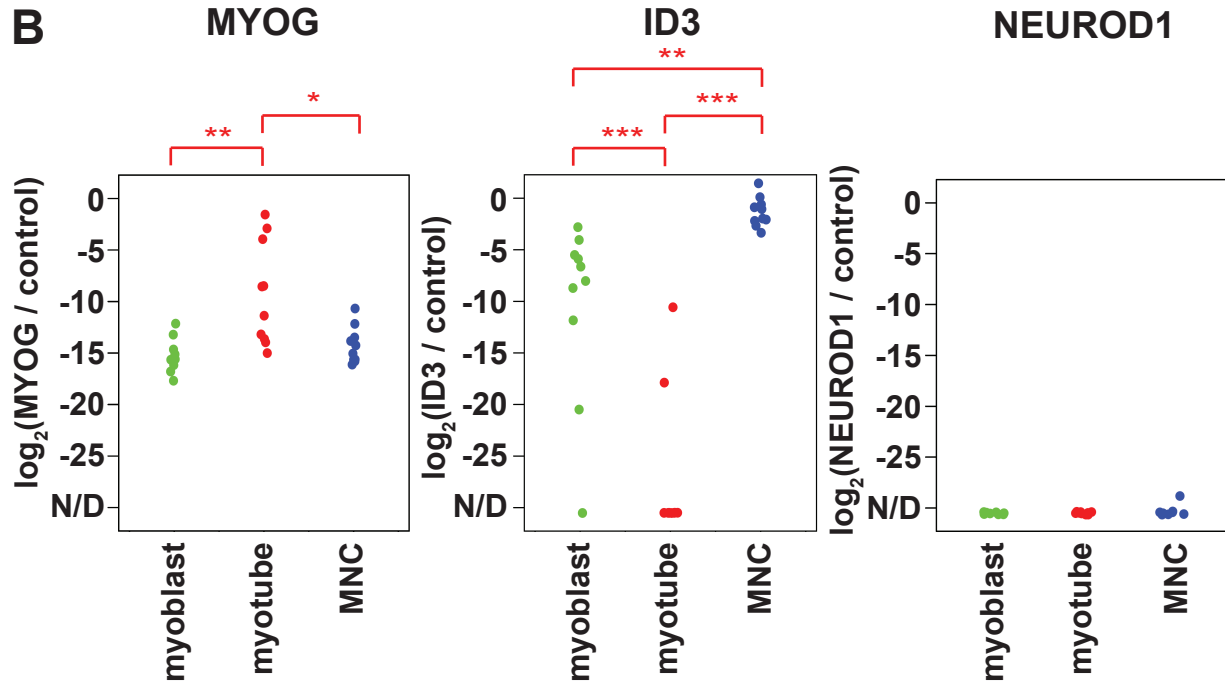**C**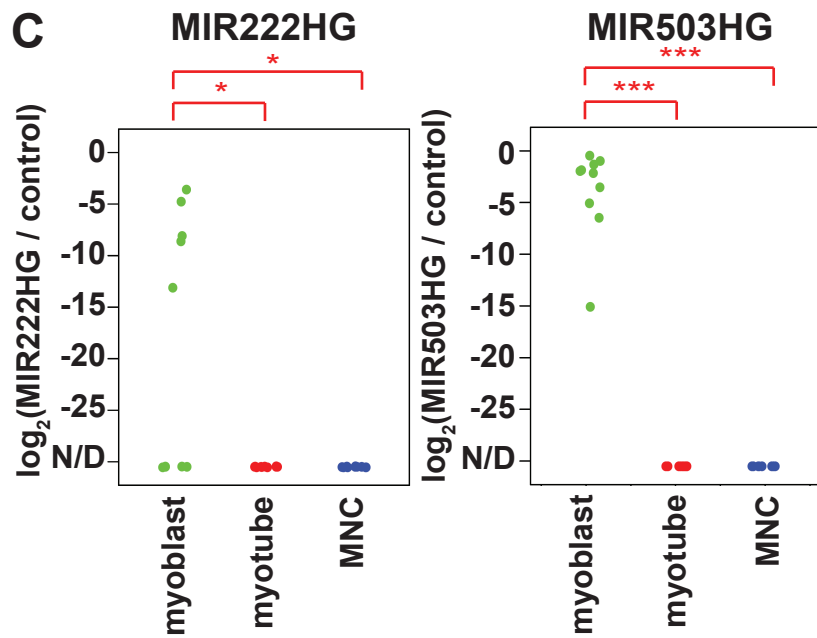

Fig S6

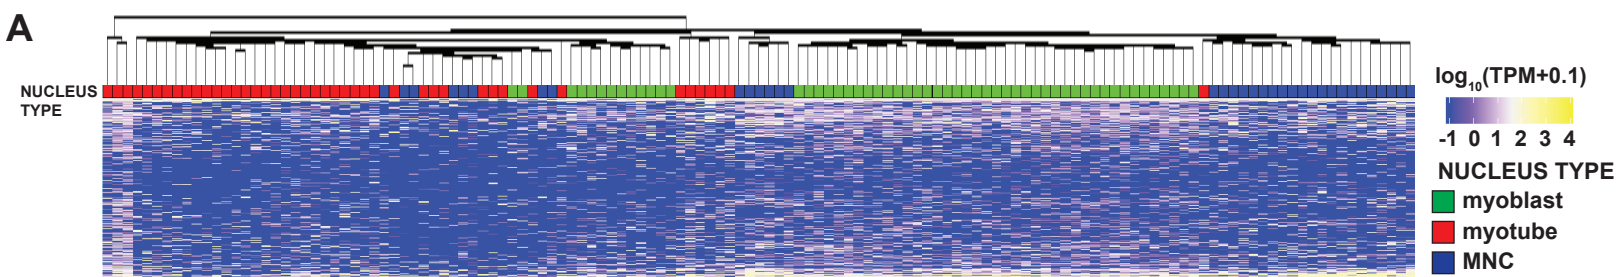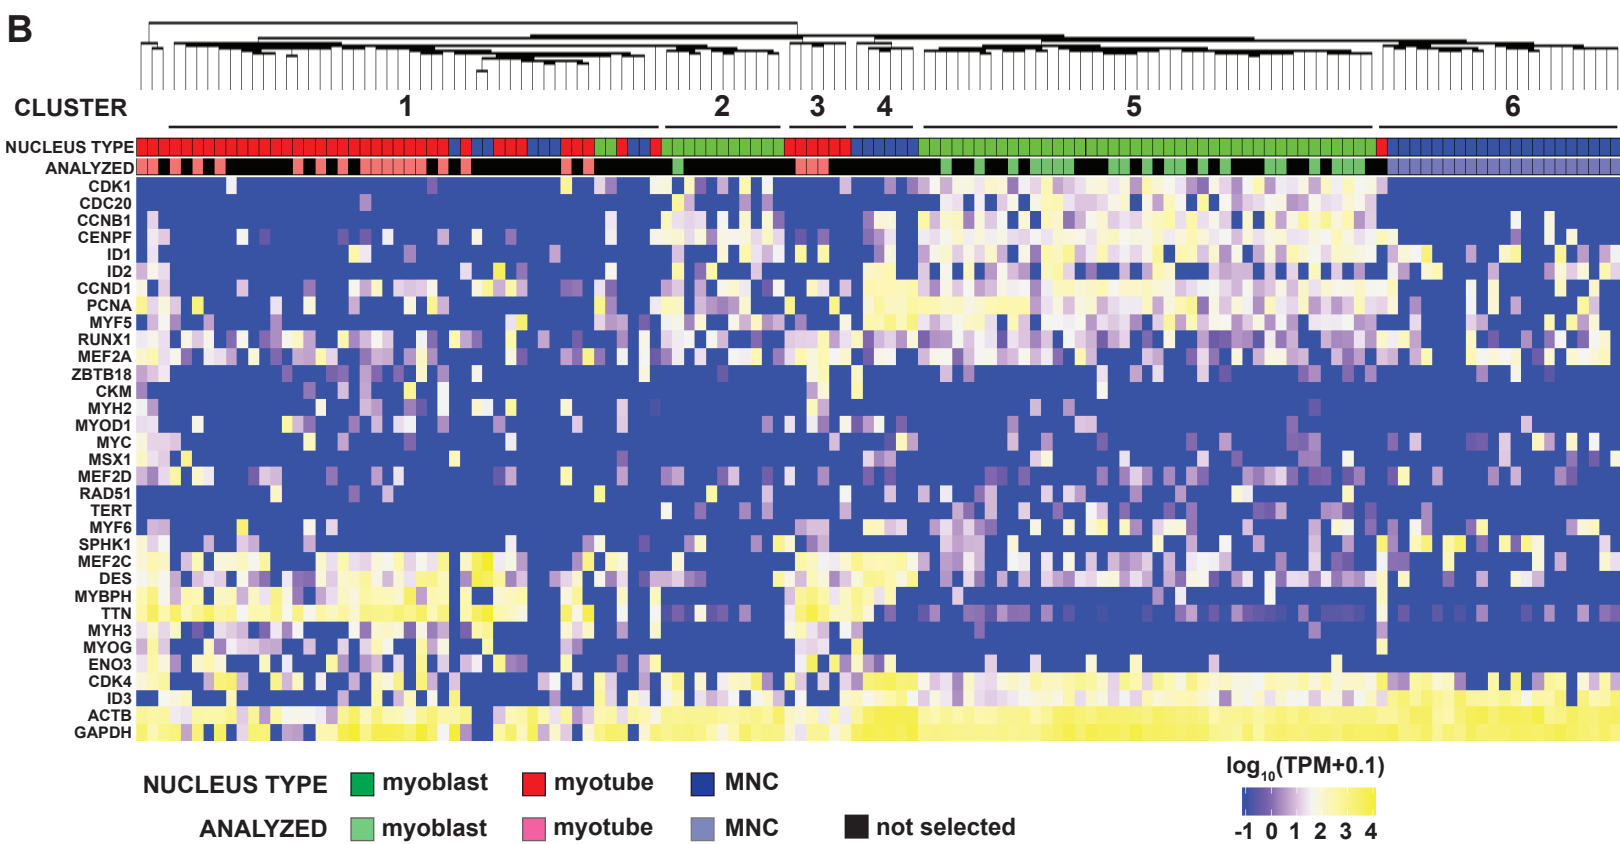

Fig S7

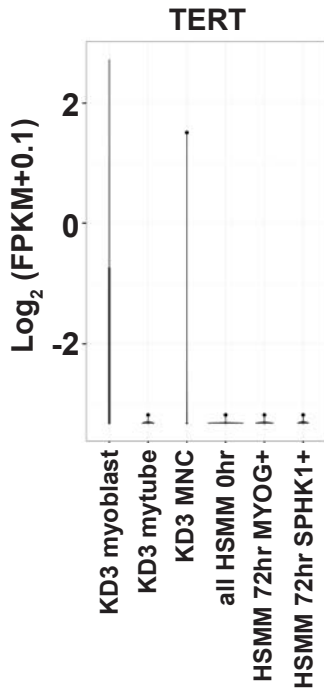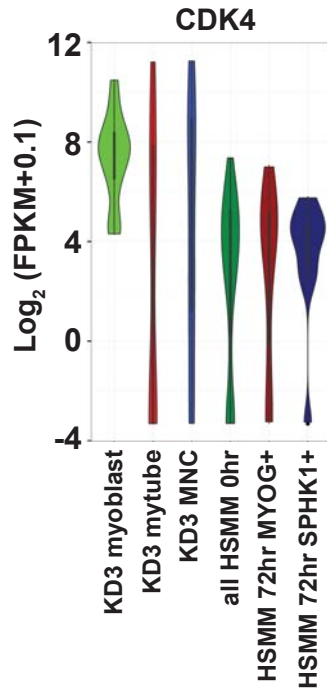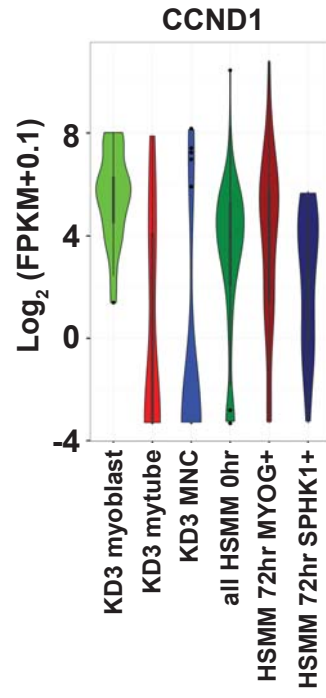

Fig S8

A

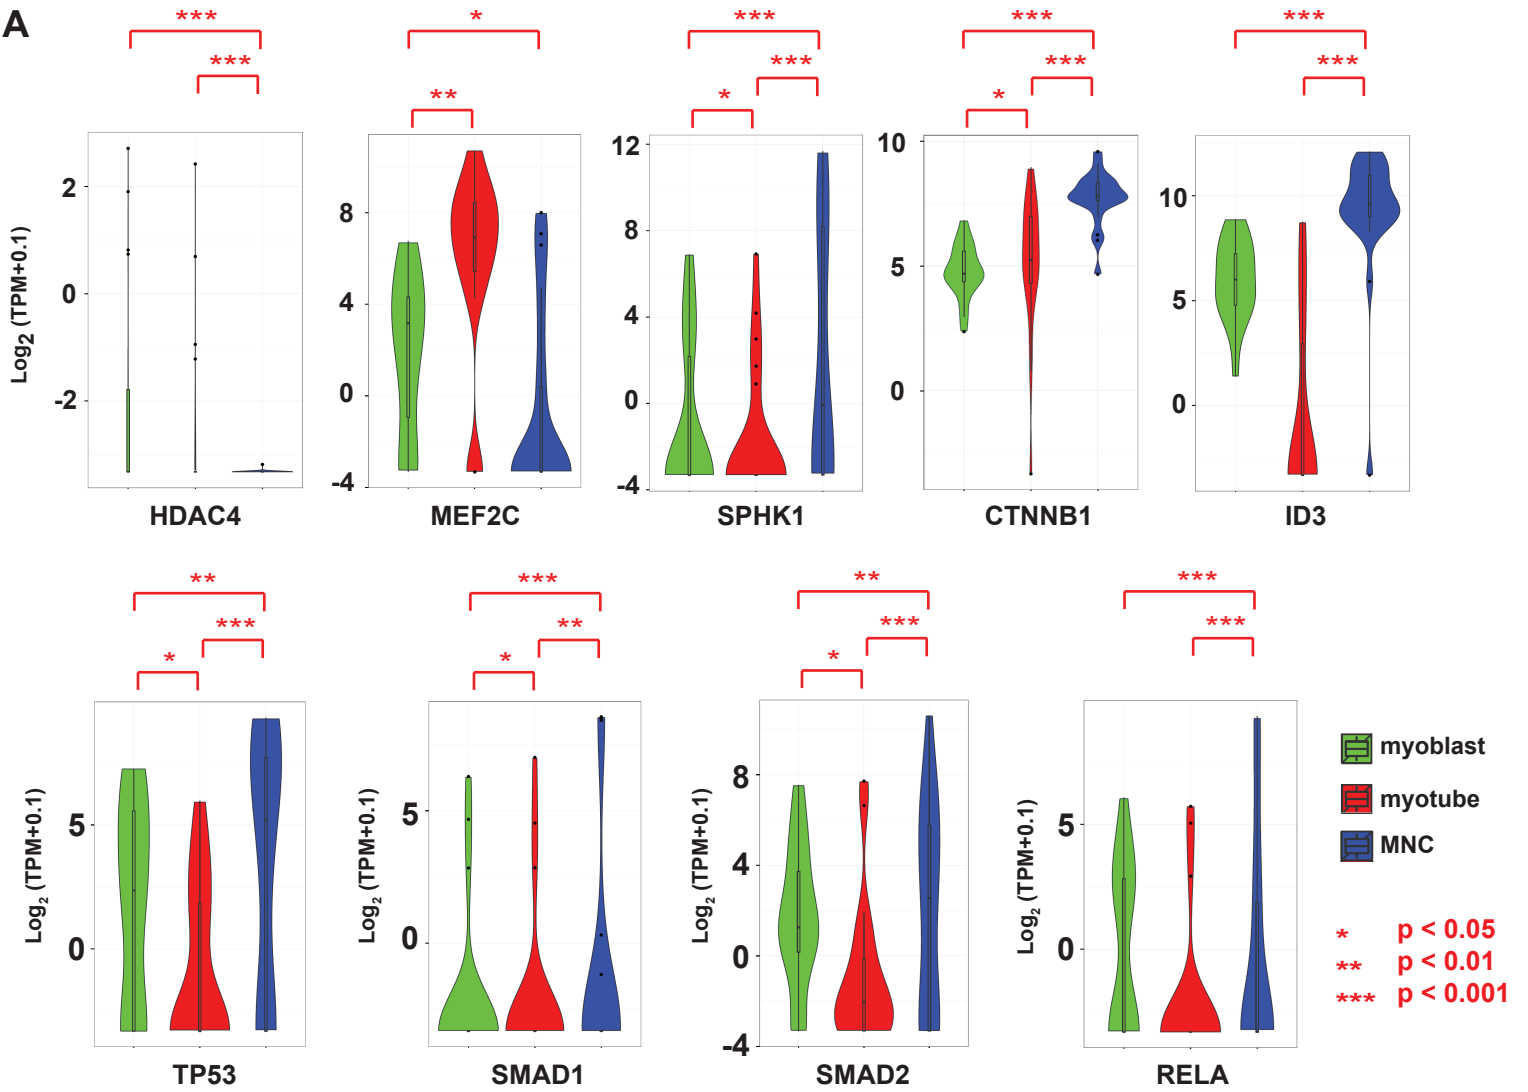

B

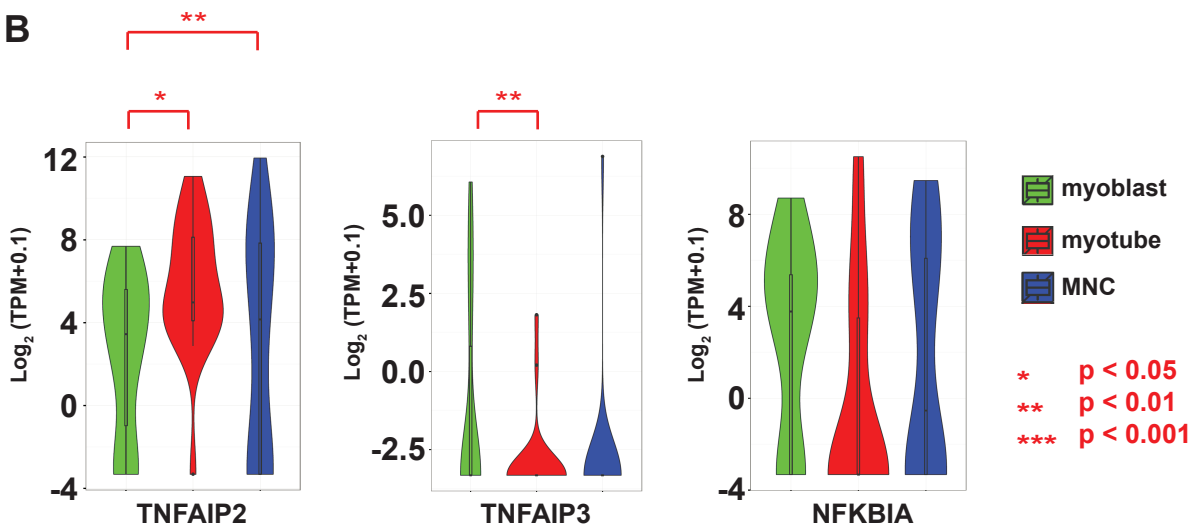



Fig S9

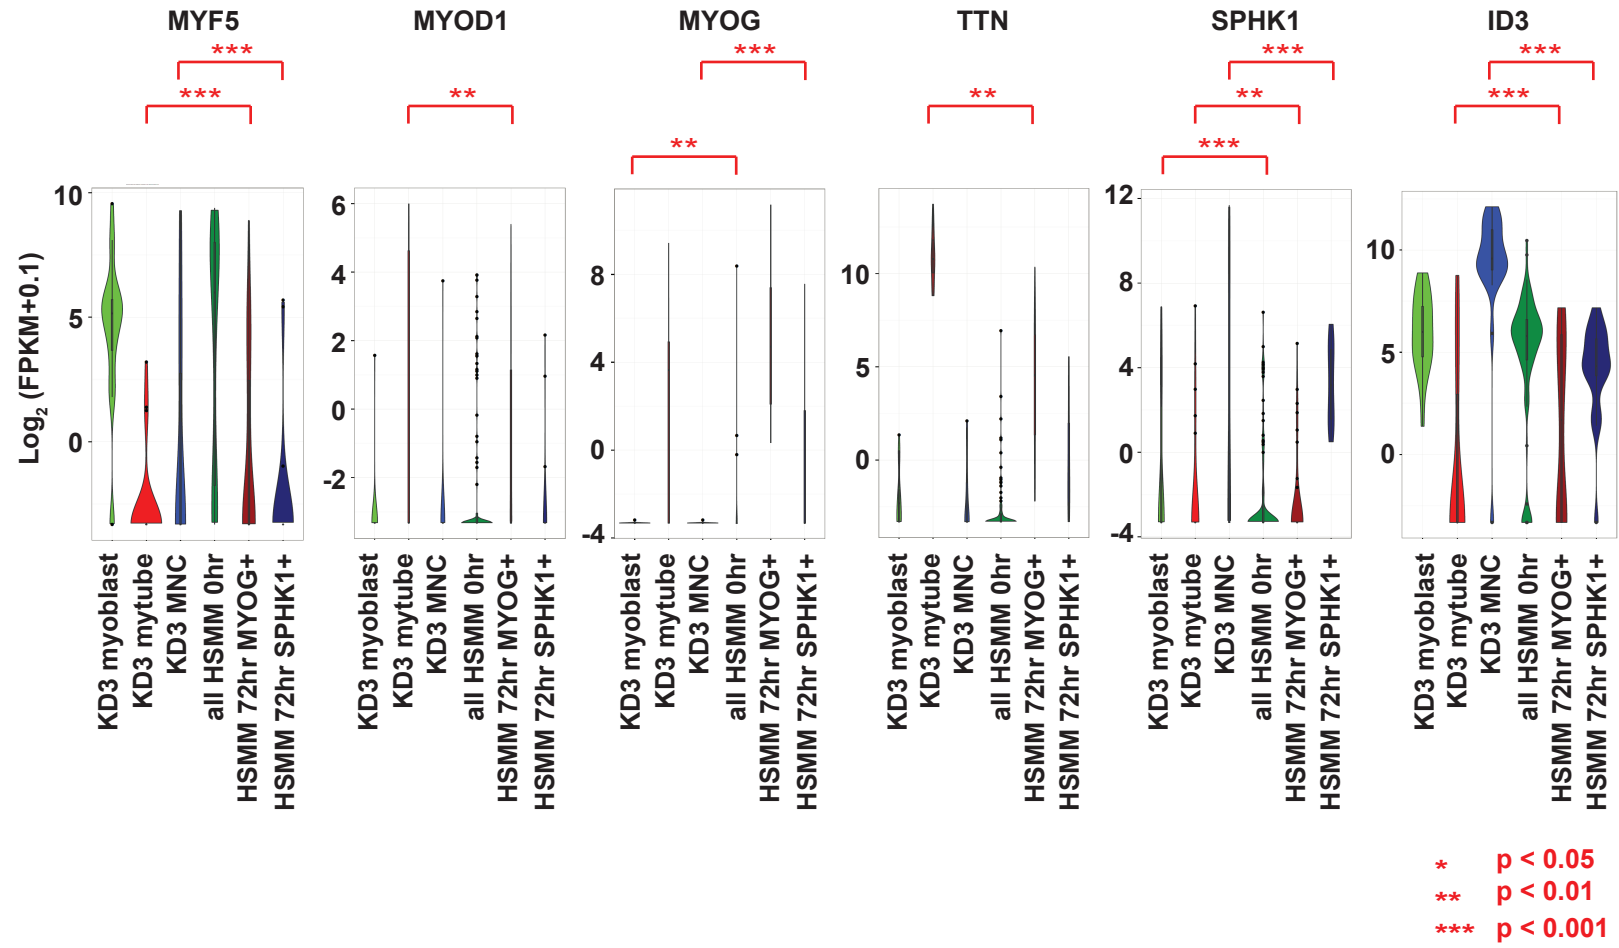

Fig S10

A

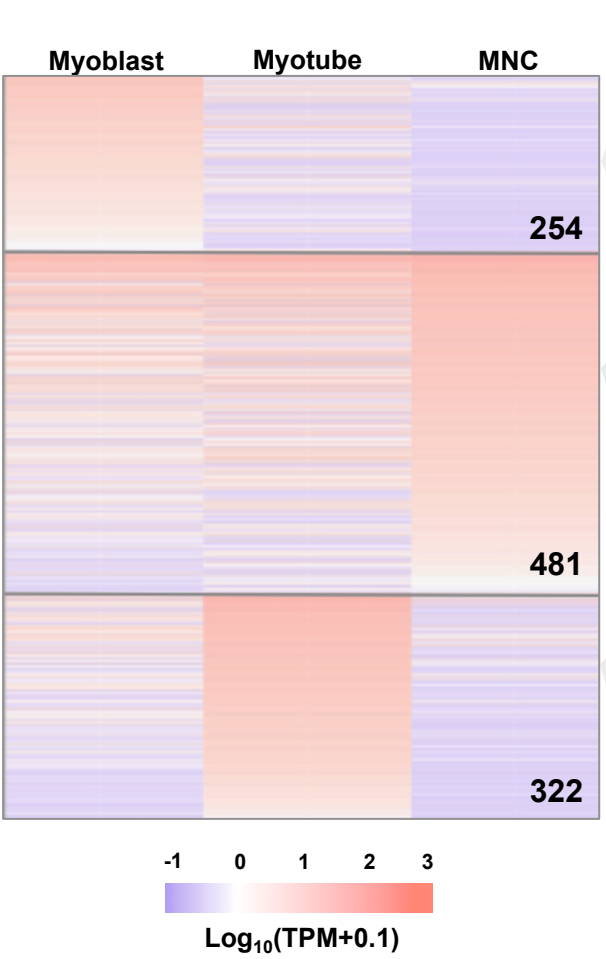

ENSG00000281881:SPRY4-IT1  
 ENSG00000222057:RP4-62F18.2  
 ENSG00000257219:RP11-54A9.1  
 ENSG00000267279:RP11-879F14.2  
 ENSG00000260304:RP11-388M20.6  
 ENSG00000248927:CTD-2334D19.1  
 ENSG00000234129:RP11-120D5.1  
 ENSG00000270607:RP11-359E10.1  
 ENSG00000248890:HHIP-AS1  
 ENSG00000242588:RP11-274B21.14  
 ENSG00000223653:RP11-131L23.1  
 ENSG00000278886:RP11-108A14.1  
 ENSG00000246560:RP11-10L12.4  
 ENSG00000279078:SND1-IT1  
 ENSG00000261916:RP11-235E17.4  
 ENSG00000253982:CTD-2336O2.1  
 ENSG00000270246:RP11-701H24.8  
 ENSG00000254879:PTPRJ-AS1  
 ENSG00000214293:APTR  
 ENSG00000179523:EIF3J-AS1  
 ENSG00000203875:SNHG5  
 ENSG00000175061:LRRCC75A-AS1  
 ENSG00000240801:AC132217.4  
 ENSG00000271895:RP4-635E18.8  
 ENSG00000263986:RP11-746M1.1  
 ENSG00000261759:RP11-626G11.3  
 ENSG00000224032:EPB41L4A-AS1  
 ENSG00000222041:LINC00152  
 ENSG00000172965:MIR4435-2HG  
 ENSG00000267458:CTC-425F1.4  
 ENSG00000242086:LINC00969  
 ENSG00000232527:RP11-14N7.2  
 ENSG00000257621:PSMA3-AS1  
 ENSG00000272990:RP11-305K5.1  
 ENSG00000245910:SNHG6  
 ENSG00000273319:RP11-138A9.2  
 ENSG00000263873:RP11-334E6.12  
 ENSG00000177410:ZFAS1  
 ENSG00000253352:TUG1  
 ENSG00000258297:RP11-658F2.8  
 ENSG00000268518:CTD-2545M3.8  
 ENSG00000249859:PVT1  
 ENSG00000255031:RP11-802E16.3  
 ENSG00000270190:RP11-803D5.4  
 ENSG00000263766:RP11-580I16.2  
 ENSG00000260807:RP11-161M6.2  
 ENSG00000248275:TRIM52-AS1  
 ENSG00000182109:RP11-69E11.4  
 ENSG00000250075:RP11-584P21.2  
 ENSG00000174407:MIR1-1HG  
 ENSG00000262533:RP11-667K14.4  
 ENSG00000280137:RP11-297C4.6  
 ENSG00000203993:ARRDC1-AS1  
 ENSG00000271941:RP11-188P20.3  
 ENSG00000280145:CH507-154B10.1  
 ENSG00000188242:PP7080  
 ENSG00000277701:RP11-734K23.9  
 ENSG00000261535:CTA-305I2.1  
 ENSG00000228830:RP4-781K5.2  
 ENSG00000225613:LINCMD1

B

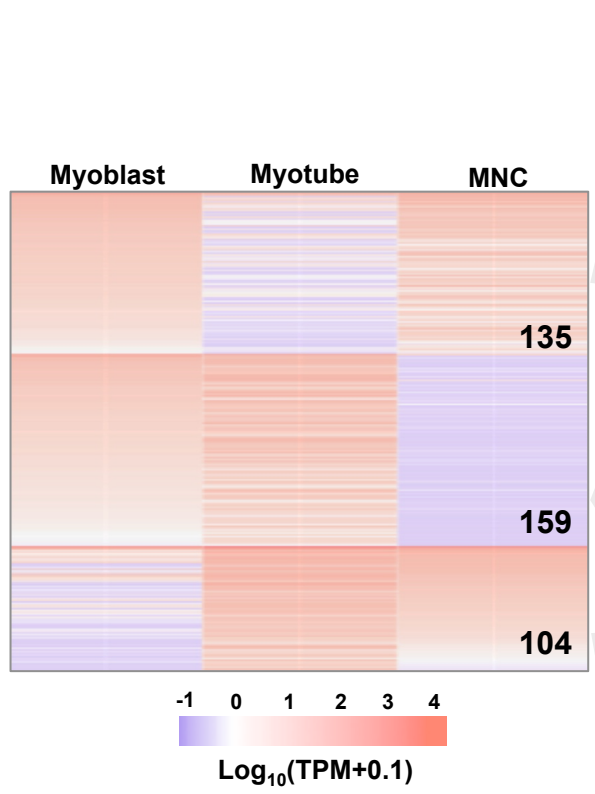

ENSG00000258017:RP11-386G11.10  
 ENSG00000258232:RP11-161H23.5  
 ENSG00000234741:GASS5  
 ENSG00000179818:PCBP1-AS1  
 ENSG00000280120:RP11-546D6.3  
 ENSG00000279632:RP11-286N22.6  
 ENSG00000267058:RP11-15A1.3  
 ENSG00000242128:SNHG3  
 ENSG00000255135:RP11-111M22.3  
 ENSG00000276334:AL133243.1  
 ENSG00000225442:MPRIP-AS1  
 ENSG00000278133:RP11-196G11.5  
 ENSG00000260260:SNHG19  
 ENSG00000246067:RAB30-AS1  
 ENSG00000279591:AC002044.1  
 ENSG00000262967:RP11-294J22.6  
 ENSG00000260257:RP5-1085F17.3  
 ENSG00000280166:RP11-354E23.3  
 ENSG00000234327:AC012146.7  
 ENSG00000261061:RP11-303E16.2  
 ENSG00000276107:CTD-2033D15.2  
 ENSG00000223749:MIR503HG  
 ENSG00000227028:SLC8A1-AS1  
 ENSG00000205885:C1RL-AS1  
 ENSG00000260912:RP11-363E7.4  
 ENSG00000266469:CTB-131K11.1  
 ENSG00000273306:RP11-527J8.1  
 ENSG00000213600:XXcos-LUCA16.1  
 ENSG00000277778:PGM5P2  
 ENSG00000279786:CTD-2014D20.1  
 ENSG00000266918:RP11-798G7.8  
 ENSG00000278621:CTD-2033D15.3  
 ENSG00000279670:RP11-70L8.5  
 ENSG00000274265:CH17-189H20.1  
 ENSG00000264112:RP11-159D12.2  
 ENSG00000198711:SSBP3-AS1  
 ENSG00000246273:SBF2-AS1  
 ENSG00000271011:RP11-171I2.5  
 ENSG00000267734:RP4-604K5.3  
 ENSG00000279599:RP11-45A17.2  
 ENSG00000251562:MALAT1  
 ENSG00000245532:NEAT1  
 ENSG00000186594:MIR22HG  
 ENSG00000273437:RP11-434H6.7  
 ENSG00000261604:CTD-2636A23.2  
 ENSG00000261552:RP11-264B17.5  
 ENSG00000272273:XXbac-BPG252P9.10  
 ENSG00000235106:LINC00094  
 ENSG00000189223:PAX8-AS1  
 ENSG00000230955:RP11-109P14.10  
 ENSG00000270640:RP11-373D23.2  
 ENSG00000276529:AP001505.10  
 ENSG00000260276:RP11-77H9.2  
 ENSG00000256007:ARAP1-AS1  
 ENSG00000273584:RP11-861L17.4  
 ENSG00000215067:ALOX12-AS1  
 ENSG00000226674:TEX41  
 ENSG00000268220:RP11-379K17.12  
 ENSG00000237298:TTN-AS1  
 ENSG00000214188:ST7-OT4

# Fig S11

## A

-1.0   -0.5   0   0.5   1.0

Correlation coefficient  
between SMART-seq coverage and nanostring miRNA expression

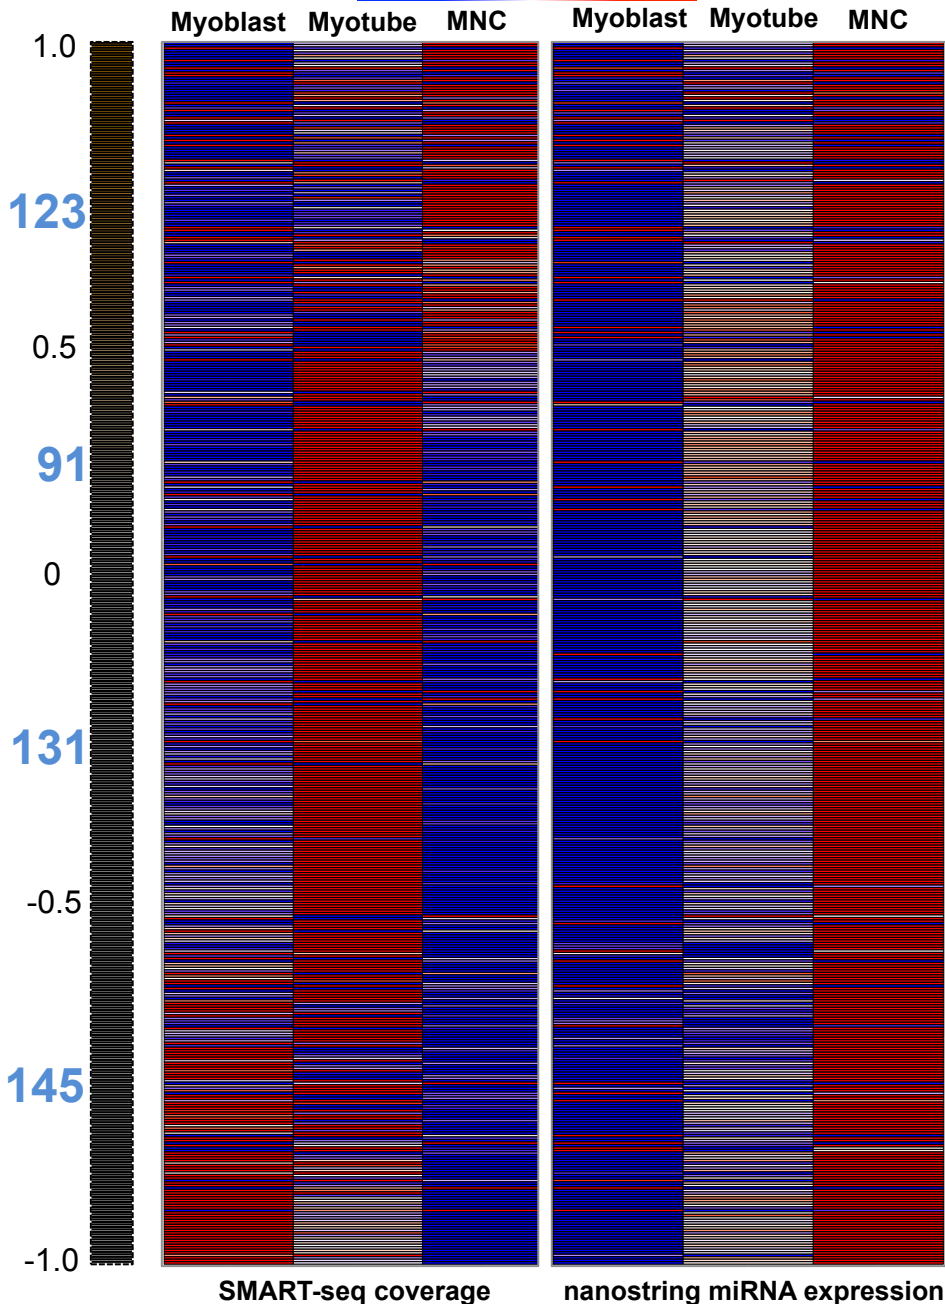

## B

| miRNA     | lncRNA        | r           | Same strand | Overlap |
|-----------|---------------|-------------|-------------|---------|
| MIR421    | FTX           | 0.999971921 | ●           | ●       |
| MIR421    | RP3-368A4.5   | 0.999971921 | ●           | ●       |
| MIR221    | MIR222HG      | 0.999777411 | ●           | ●       |
| MIR628    | DYX1C1-CCPG1  | 0.999254049 | ●           | ●       |
| MIR29A    | AC058791.1    | 0.998871016 | ●           | ●       |
| MIR148B   | RP11-968A15.8 | 0.997806686 | ●           | ●       |
| MIR222    | MIR222HG      | 0.993906409 | ●           | ●       |
| MIR210    | MIR210HG      | 0.992865427 | ●           | ●       |
| MIR141    | U47924.27     | 0.991674063 | ●           | ●       |
| MIR141    | U47924.29     | 0.991674063 | ●           | ●       |
| MIR2113   | RP11-436D23.1 | 0.989367849 | ●           | ●       |
| MIR30B    | AC083843.1    | 0.986931656 | ●           | ●       |
| MIR675    | H19           | 0.986901119 | ●           | ●       |
| MIR223    | RP6-159A1.4   | 0.985055911 | ●           | ●       |
| MIR770    | MEG3          | 0.984900118 | ●           | ●       |
| MIR133A2  | MIR1-1HG      | 0.982896359 | ●           | ●       |
| MIR133B   | LINCMD1       | 0.979690547 | ●           | ●       |
| MIR92A1   | MIR17HG       | 0.973743515 | ●           | ●       |
| MIR24-2   | CTD-3252C9.4  | 0.963019249 | ●           | ●       |
| MIR23A    | CTD-3252C9.4  | 0.961190177 | ●           | ●       |
| MIR568    | RP11-553L6.5  | 0.959749143 | ●           | ●       |
| MIR503    | MIR503HG      | 0.958898365 | ●           | ●       |
| MIR655    | MIR381HG      | 0.952452199 | ●           | ●       |
| MIRLET7D  | RP11-2B6.3    | 0.930720304 | ●           | ●       |
| MIRLET7D  | RP11-2B6.2    | 0.930720304 | ●           | ●       |
| MIR206    | LINCMD1       | 0.930719587 | ●           | ●       |
| MIR181A1  | MIR181A1HG    | 0.910454043 | ●           | ●       |
| MIR381    | MIR381HG      | 0.893540499 | ●           | ●       |
| MIR487A   | MIR381HG      | 0.843149071 | ●           | ●       |
| MIR1305   | RP11-402C9.1  | 0.81880738  | ●           | ●       |
| MIR487B   | MIR381HG      | 0.814219188 | ●           | ●       |
| MIRLET7A1 | RP11-2B6.2    | 0.785889497 | ●           | ●       |
| MIRLET7A1 | RP11-2B6.3    | 0.785889497 | ●           | ●       |
| MIR20A    | MIR17HG       | 0.784714255 | ●           | ●       |
| MIR133A1  | MIR133A1HG    | 0.78166434  | ●           | ●       |
| MIRLET7F1 | RP11-2B6.3    | 0.755822968 | ●           | ●       |
| MIRLET7F1 | RP11-2B6.2    | 0.755822968 | ●           | ●       |
| MIR544A   | MIR381HG      | 0.740151196 | ●           | ●       |
| MIR181B1  | MIR181A1HG    | 0.731594025 | ●           | ●       |
| MIR155    | MIR155HG      | 0.729875964 | ●           | ●       |
| MIR195    | RP11-589P10.7 | 0.717107837 | ●           | ●       |
| MIR195    | MIR497HG      | 0.717107837 | ●           | ●       |
| MIR889    | MIR381HG      | 0.705686504 | ●           | ●       |
| MIR570    | LINC00969     | 0.680459534 | ●           | ●       |
| MIR1539   | MIR1539       | 0.642441322 | ●           | ●       |
| MIR134    | MIR381HG      | 0.616418919 | ●           | ●       |
| MIRLET7B  | MIRLET7BHG    | 0.613282134 | ●           | ●       |
| MIR1-1    | MIR1-1HG      | 0.605615978 | ●           | ●       |
| MIR125B1  | RP11-166D19.1 | 0.563329507 | ●           | ●       |
| MIRLET7I  | RP11-631N16.2 | 0.525892573 | ●           | ●       |
| MIRLET7I  | RP11-631N16.4 | 0.525892573 | ●           | ●       |
| MIR370    | MEG8          | 0.510520736 | ●           | ●       |

— yes  
— no
